# Supplementary material
Source: ML conference proceedings conference paper supplement (https://proceedings.mlr.press/v89/zhou19c.html)
Supplement: Supplementary file [file zhou19c-supp.pdf]

---

## Supplementary Material for “Direct Acceleration of SAGA using Sampled Negative Momentum”

---

### A Proof of Lemma 1

Lemma 1 is technically similar to Lemma 3.4 in [Allen-Zhu, 2017], but since they are not exactly the same, we include a proof here.

$$\begin{aligned}
\mathbb{E}_{i_k} \left[ \left\| \tilde{\nabla}_k - \frac{1}{n} \sum_{i=1}^n \nabla f_i(y_i^k) \right\|^2 \right] &= \mathbb{E}_{i_k} \left[ \left\| \left( \nabla f_{i_k}(y_{i_k}^k) - \nabla f_{i_k}(\phi_{i_k}^k) \right) - \frac{1}{n} \sum_{i=1}^n \left( \nabla f_i(y_i^k) - \nabla f_i(\phi_i^k) \right) \right\|^2 \right] \\
&\stackrel{(a)}{\leq} \mathbb{E}_{i_k} \left[ \left\| \nabla f_{i_k}(y_{i_k}^k) - \nabla f_{i_k}(\phi_{i_k}^k) \right\|^2 \right] \\
&\stackrel{(b)}{\leq} 2L \cdot \mathbb{E}_{i_k} \left[ f_{i_k}(\phi_{i_k}^k) - f_{i_k}(y_{i_k}^k) - \langle \nabla f_{i_k}(y_{i_k}^k), \phi_{i_k}^k - y_{i_k}^k \rangle \right] \\
&= 2L \left( \frac{1}{n} \sum_{i=1}^n \left( f_i(\phi_i^k) - f(y_i^k) \right) - \frac{1}{n} \sum_{i=1}^n \langle \nabla f_i(y_i^k), \phi_i^k - y_i^k \rangle \right),
\end{aligned}$$

where (a) follows from  $\mathbb{E}[\|\zeta - \mathbb{E}\zeta\|^2] \leq \mathbb{E}\|\zeta\|^2$  and (b) uses Theorem 2.1.5 in [Nesterov, 2004].

### B Proof of Theorem 1

The proof of Theorem 1 combines the ideas in SAGA [Defazio et al., 2014], Katyusha [Allen-Zhu, 2017] and [Zhou et al., 2018].

In order to prove Theorem 1, we need the following useful lemma, which can be regarded as using the 3-point equality of Bregman divergence in the Euclidean norm setting:

**Lemma 3.** *If two vectors  $x_{k+1}, x_k \in \mathbb{R}^d$  satisfy  $x_{k+1} = \arg \min_x \{h(x) + \langle \tilde{\nabla}_k, x \rangle + \frac{1}{2\eta} \|x_k - x\|^2\}$  with a constant vector  $\tilde{\nabla}_k$  and a  $\mu$ -strongly convex function  $h(\cdot)$ , then for all  $u \in \mathbb{R}^d$ , we have*

$$\langle \tilde{\nabla}_k, x_{k+1} - u \rangle \leq -\frac{1}{2\eta} \|x_{k+1} - x_k\|^2 + \frac{1}{2\eta} \|x_k - u\|^2 - \frac{1 + \eta\mu}{2\eta} \|x_{k+1} - u\|^2 + h(u) - h(x_{k+1}).$$

This Lemma is identical to Lemma 3.5 in [Allen-Zhu, 2017], and hence the proof is omitted.

First, we analyze Algorithm 1 at the  $k$ th iteration, given that the randomness from previous iterations are fixed.

We start with the convexity of  $f_{i_k}(\cdot)$  at  $(y_{i_k}^k, x^*)$ . By definition, we have

$$\begin{aligned}
f_{i_k}(y_{i_k}^k) - f_{i_k}(x^*) &\leq \langle \nabla f_{i_k}(y_{i_k}^k), y_{i_k}^k - x^* \rangle \\
&\stackrel{(\star)}{=} \frac{1 - \tau}{\tau} \langle \nabla f_{i_k}(y_{i_k}^k), \phi_{i_k}^k - y_{i_k}^k \rangle + \langle \nabla f_{i_k}(y_{i_k}^k) - \tilde{\nabla}_k, x_k - x^* \rangle + \langle \tilde{\nabla}_k, x_k - x_{k+1} \rangle \\
&\quad + \langle \tilde{\nabla}_k, x_{k+1} - x^* \rangle,
\end{aligned}$$

where  $(\star)$  uses the definition of the  $i_k$ th entry of “coupled table” that  $y_{i_k}^k = \tau x_k + (1 - \tau)\phi_{i_k}^k$ .

As we will see, the first term on the right side is used to cancel the unwanted inner product term in the variance bound.

By taking expectation with respect to sample  $i_k$  and using the unbiasedness that  $\mathbb{E}_{i_k} [\nabla f_{i_k}(y_{i_k}^k) - \tilde{\nabla}_k] = \mathbf{0}$ , we obtain

$$\frac{1}{n} \sum_{i=1}^n f_i(y_i^k) - f(x^*) \leq \frac{1-\tau}{\tau n} \sum_{i=1}^n \langle \nabla f_i(y_i^k), \phi_i^k - y_i^k \rangle + \mathbb{E}_{i_k} [\langle \tilde{\nabla}_k, x_k - x_{k+1} \rangle] + \mathbb{E}_{i_k} [\langle \tilde{\nabla}_k, x_{k+1} - x^* \rangle]. \quad (4)$$

In order to bound  $\mathbb{E}_{i_k} [\langle \tilde{\nabla}_k, x_k - x_{k+1} \rangle]$ , we use the  $L$ -smoothness of  $f_{I_k}(\cdot)$  at  $(\phi_{I_k}^{k+1}, y_{I_k}^k)$ , which is

$$f_{I_k}(\phi_{I_k}^{k+1}) - f_{I_k}(y_{I_k}^k) \leq \langle \nabla f_{I_k}(y_{I_k}^k), \phi_{I_k}^{k+1} - y_{I_k}^k \rangle + \frac{L}{2} \|\phi_{I_k}^{k+1} - y_{I_k}^k\|^2.$$

Taking expectation with respect to sample  $I_k$  and using our choice of  $\phi_{I_k}^{k+1} = \tau x_{k+1} + (1-\tau)\phi_{I_k}^k$  as well as the definition of ‘‘coupled table’’, we conclude that

$$\begin{aligned} \mathbb{E}_{I_k} [f_{I_k}(\phi_{I_k}^{k+1})] - \frac{1}{n} \sum_{i=1}^n f_i(y_i^k) &\leq \tau \left\langle \frac{1}{n} \sum_{i=1}^n \nabla f_i(y_i^k), x_{k+1} - x_k \right\rangle + \frac{L\tau^2}{2} \|x_{k+1} - x_k\|^2, \\ \langle \tilde{\nabla}_k, x_k - x_{k+1} \rangle &\leq \frac{1}{\tau n} \sum_{i=1}^n f_i(y_i^k) - \frac{1}{\tau} \mathbb{E}_{I_k} [f_{I_k}(\phi_{I_k}^{k+1})] + \left\langle \frac{1}{n} \sum_{i=1}^n \nabla f_i(y_i^k) - \tilde{\nabla}_k, x_{k+1} - x_k \right\rangle + \frac{L\tau}{2} \|x_{k+1} - x_k\|^2. \end{aligned}$$

Here we see the effect of the independent sample  $I_k$ . It decouples the randomness of  $x_{k+1}$  and the update position so as to make the above inequalities valid.

Taking expectation with respect to sample  $i_k$ , we obtain

$$\begin{aligned} \mathbb{E}_{i_k} [\langle \tilde{\nabla}_k, x_k - x_{k+1} \rangle] &\leq \frac{1}{\tau n} \sum_{i=1}^n f_i(y_i^k) - \frac{1}{\tau} \mathbb{E}_{i_k, I_k} [f_{I_k}(\phi_{I_k}^{k+1})] + \mathbb{E}_{i_k} \left[ \left\langle \frac{1}{n} \sum_{i=1}^n \nabla f_i(y_i^k) - \tilde{\nabla}_k, x_{k+1} - x_k \right\rangle \right] \\ &\quad + \frac{L\tau}{2} \mathbb{E}_{i_k} [\|x_{k+1} - x_k\|^2]. \end{aligned} \quad (5)$$

By upper bounding (4) using (5) and Lemma 3 (with  $h(\cdot)$   $\mu$ -strongly convex and  $u = x^*$ ), we obtain

$$\begin{aligned} \frac{1}{n} \sum_{i=1}^n f_i(y_i^k) - f(x^*) &\leq \frac{1-\tau}{\tau n} \sum_{i=1}^n \langle \nabla f_i(y_i^k), \phi_i^k - y_i^k \rangle + \frac{1}{\tau n} \sum_{i=1}^n f_i(y_i^k) - \frac{1}{\tau} \mathbb{E}_{i_k, I_k} [f_{I_k}(\phi_{I_k}^{k+1})] \\ &\quad + \mathbb{E}_{i_k} \left[ \left\langle \frac{1}{n} \sum_{i=1}^n \nabla f_i(y_i^k) - \tilde{\nabla}_k, x_{k+1} - x_k \right\rangle \right] + \frac{L\tau}{2} \mathbb{E}_{i_k} [\|x_{k+1} - x_k\|^2] \\ &\quad - \frac{1}{2\eta} \mathbb{E}_{i_k} [\|x_{k+1} - x_k\|^2] + \frac{1}{2\eta} \|x_k - x^*\|^2 - \frac{1+\eta\mu}{2\eta} \mathbb{E}_{i_k} [\|x_{k+1} - x^*\|^2] \\ &\quad + h(x^*) - \mathbb{E}_{i_k} [h(x_{k+1})]. \end{aligned}$$

Here we add a constraint that  $L\tau \leq \frac{1}{\eta} - \frac{L\tau}{1-\tau}$ , which is identical to the one used in [Zhou et al., 2018]. Using Young’s inequality  $\langle a, b \rangle \leq \frac{1}{2\beta} \|a\|^2 + \frac{\beta}{2} \|b\|^2$  to upper bound  $\mathbb{E}_{i_k} \left[ \left\langle \frac{1}{n} \sum_{i=1}^n \nabla f_i(y_i^k) - \tilde{\nabla}_k, x_{k+1} - x_k \right\rangle \right]$  with  $\beta = \frac{L\tau}{1-\tau} > 0$ , we can simplify the above inequality as

$$\begin{aligned} \frac{1}{n} \sum_{i=1}^n f_i(y_i^k) - f(x^*) &\leq \frac{1-\tau}{\tau n} \sum_{i=1}^n \langle \nabla f_i(y_i^k), \phi_i^k - y_i^k \rangle + \frac{1}{\tau n} \sum_{i=1}^n f_i(y_i^k) - \frac{1}{\tau} \mathbb{E}_{i_k, I_k} [f_{I_k}(\phi_{I_k}^{k+1})] \\ &\quad + \frac{1-\tau}{2L\tau} \mathbb{E}_{i_k} \left[ \left\| \frac{1}{n} \sum_{i=1}^n \nabla f_i(y_i^k) - \tilde{\nabla}_k \right\|^2 \right] + \frac{1}{2\eta} \|x_k - x^*\|^2 - \frac{1+\eta\mu}{2\eta} \mathbb{E}_{i_k} [\|x_{k+1} - x^*\|^2] \\ &\quad + h(x^*) - \mathbb{E}_{i_k} [h(x_{k+1})]. \end{aligned}$$

By applying Lemma 1 to upper bound the variance term, we see that the additional variance term in the variance bound is canceled by the sampled momentum, which gives

$$\begin{aligned}
\frac{1}{n} \sum_{i=1}^n f_i(y_i^k) - f(x^*) &\leq \frac{1}{\tau n} \sum_{i=1}^n f_i(y_i^k) - \frac{1}{\tau} \mathbb{E}_{i_k, I_k} [f_{I_k}(\phi_{I_k}^{k+1})] + \frac{1-\tau}{\tau n} \sum_{i=1}^n (f_i(\phi_i^k) - f(y_i^k)) \\
&\quad + \frac{1}{2\eta} \|x_k - x^*\|^2 - \frac{1+\eta\mu}{2\eta} \mathbb{E}_{i_k} [\|x_{k+1} - x^*\|^2] + h(x^*) - \mathbb{E}_{i_k} [h(x_{k+1})], \\
\frac{1}{\tau} \mathbb{E}_{i_k, I_k} [f_{I_k}(\phi_{I_k}^{k+1})] - F(x^*) &\leq \frac{1-\tau}{\tau n} \sum_{i=1}^n f_i(\phi_i^k) + \frac{1}{2\eta} \|x_k - x^*\|^2 - \frac{1+\eta\mu}{2\eta} \mathbb{E}_{i_k} [\|x_{k+1} - x^*\|^2] - \mathbb{E}_{i_k} [h(x_{k+1})].
\end{aligned} \tag{6}$$

Using the convexity of  $h(\cdot)$  and that  $\phi_{I_k}^{k+1} = \tau x_{k+1} + (1-\tau)\phi_{I_k}^k$ , we have

$$h(\phi_{I_k}^{k+1}) \leq \tau h(x_{k+1}) + (1-\tau)h(\phi_{I_k}^k).$$

After taking expectation with respect to sample  $I_k$  and sample  $i_k$ , we obtain

$$-\mathbb{E}_{i_k} [h(x_{k+1})] \leq \frac{1-\tau}{\tau n} \sum_{i=1}^n h(\phi_i^k) - \frac{1}{\tau} \mathbb{E}_{i_k, I_k} [h(\phi_{I_k}^{k+1})].$$

Combining the above inequality with (6) and using the definition that  $F_i(\cdot) = f_i(\cdot) + h(\cdot)$ , we can write (6) as

$$\frac{1}{\tau} \mathbb{E}_{i_k, I_k} [F_{I_k}(\phi_{I_k}^{k+1}) - F_{I_k}(x^*)] \leq \frac{1-\tau}{\tau} \left( \frac{1}{n} \sum_{i=1}^n F_i(\phi_i^k) - F(x^*) \right) + \frac{1}{2\eta} \|x_k - x^*\|^2 - \frac{1+\eta\mu}{2\eta} \mathbb{E}_{i_k} [\|x_{k+1} - x^*\|^2].$$

Dividing the above inequality by  $n$  and adding both sides by  $\frac{1}{\tau n} \mathbb{E}_{I_k} [\sum_{i \neq I_k}^n (F_i(\phi_i^k) - F_i(x^*))]$ , we obtain

$$\begin{aligned}
\frac{1}{\tau} \mathbb{E}_{i_k, I_k} \left[ \frac{1}{n} \sum_{i=1}^n F_i(\phi_i^{k+1}) - F(x^*) \right] &\leq \frac{1-\tau}{\tau n} \left( \frac{1}{n} \sum_{i=1}^n (F_i(\phi_i^k) - F_i(x^*)) \right) + \frac{1}{\tau n} \mathbb{E}_{I_k} \left[ \sum_{i \neq I_k}^n (F_i(\phi_i^k) - F_i(x^*)) \right] \\
&\quad + \frac{1}{2\eta n} \|x_k - x^*\|^2 - \frac{1+\eta\mu}{2\eta n} \mathbb{E}_{i_k} [\|x_{k+1} - x^*\|^2] \\
&= \frac{1-\tau}{\tau n} \left( \frac{1}{n} \sum_{i=1}^n (F_i(\phi_i^k) - F_i(x^*)) \right) + \frac{1}{\tau n^2} \sum_{j=1}^n \sum_{i \neq j}^n (F_i(\phi_i^k) - F_i(x^*)) \\
&\quad + \frac{1}{2\eta n} \|x_k - x^*\|^2 - \frac{1+\eta\mu}{2\eta n} \mathbb{E}_{i_k} [\|x_{k+1} - x^*\|^2] \\
&= \frac{1-\tau}{\tau} \left( \frac{1}{n} \sum_{i=1}^n F_i(\phi_i^k) - F(x^*) \right) + \frac{1}{2\eta n} \|x_k - x^*\|^2 \\
&\quad - \frac{1+\eta\mu}{2\eta n} \mathbb{E}_{i_k} [\|x_{k+1} - x^*\|^2].
\end{aligned} \tag{7}$$

Since  $\frac{1}{n} \sum_{i=1}^n F_i(\phi_i^k) - F(x^*)$  may not be positive, we need to involve the following term in our Lyapunov function:

$$\begin{aligned}
-\frac{1}{n} \sum_{i=1}^n \langle \nabla F_i(x^*), \phi_i^{k+1} - x^* \rangle &= -\frac{1}{n} \langle \nabla F_{I_k}(x^*), \phi_{I_k}^{k+1} - x^* \rangle - \frac{1}{n} \sum_{i \neq I_k}^n \langle \nabla F_i(x^*), \phi_i^k - x^* \rangle \\
&= -\frac{\tau}{n} \langle \nabla F_{I_k}(x^*), x_{k+1} - x^* \rangle + \frac{\tau}{n} \langle \nabla F_{I_k}(x^*), \phi_{I_k}^k - x^* \rangle \\
&\quad - \frac{1}{n} \sum_{i=1}^n \langle \nabla F_i(x^*), \phi_i^k - x^* \rangle.
\end{aligned}$$

After taking expectation with respect to sample  $I_k$  and  $i_k$ , we obtain

$$\mathbb{E}_{i_k, I_k} \left[ -\frac{1}{n} \sum_{i=1}^n \langle \nabla F_i(x^*), \phi_i^{k+1} - x^* \rangle \right] = -\left(1 - \frac{\tau}{n}\right) \left( \frac{1}{n} \sum_{i=1}^n \langle \nabla F_i(x^*), \phi_i^k - x^* \rangle \right). \quad (8)$$

In order to give a clean proof, we denote  $D_k \triangleq \frac{1}{n} \sum_{i=1}^n F_i(\phi_i^k) - F(x^*) - \frac{1}{n} \sum_{i=1}^n \langle \nabla F_i(x^*), \phi_i^k - x^* \rangle$  and  $P_k \triangleq \|x_k - x^*\|^2$ , then by combining (7), (8), we can write the contraction as

$$\frac{1}{\tau} \mathbb{E}_{i_k, I_k} [D_{k+1}] + \frac{1 + \eta\mu}{2\eta n} \mathbb{E}_{i_k} [P_{k+1}] \leq \frac{1 - \frac{\tau}{n}}{\tau} D_k + \frac{1}{2\eta n} P_k. \quad (9)$$

**Case I:** Consider the first case with  $\frac{n}{\kappa} \leq \frac{3}{4}$ , choosing  $\eta = \sqrt{\frac{1}{3\mu n L}}$  and  $\tau = \frac{n\eta\mu}{1+\eta\mu} = \frac{\sqrt{\frac{n}{3\kappa}}}{1+\sqrt{\frac{1}{3n\kappa}}} < \frac{1}{2}$ , we first evaluate the parameter constraint:

$$L\tau \leq \frac{1}{\eta} - \frac{L\tau}{1-\tau} \Rightarrow \underbrace{\frac{2-\tau}{1-\tau}}_{<3} \cdot \underbrace{\frac{\sqrt{\frac{n}{3\kappa}}}{1+\sqrt{\frac{1}{3n\kappa}}}}_{\leq \sqrt{\frac{n}{3\kappa}}} \leq \sqrt{\frac{3n}{\kappa}},$$

which means that the constraint is satisfied by our parameter choices.

Moreover, with this choice of  $\tau$ , we have

$$\frac{1}{\tau(1+\eta\mu)} = \frac{1 - \frac{\tau}{n}}{\tau} = \frac{1}{n\eta\mu}.$$

Thus, the contraction (9) can be written as

$$\frac{1}{n\eta\mu} \mathbb{E}_{i_k, I_k} [D_{k+1}] + \frac{1}{2\eta n} \mathbb{E}_{i_k} [P_{k+1}] \leq (1 + \eta\mu)^{-1} \cdot \left( \frac{1}{n\eta\mu} D_k + \frac{1}{2\eta n} P_k \right).$$

After telescoping the above contraction from  $k = 1 \dots K$  and taking expectation with respect to all randomness, we have

$$\frac{1}{n\eta\mu} \mathbb{E}[D_{K+1}] + \frac{1}{2\eta n} \mathbb{E}[P_{K+1}] \leq (1 + \eta\mu)^{-K} \cdot \left( \frac{1}{n\eta\mu} D_1 + \frac{1}{2\eta n} P_1 \right).$$

Note that  $D_1 = F(x_1) - F(x^*)$  and  $\mathbb{E}[D_{K+1}] \geq 0$  based on convexity. After substituting the parameter choices, we have

$$\mathbb{E}[\|x_{K+1} - x^*\|^2] \leq \left(1 + \sqrt{\frac{1}{3n\kappa}}\right)^{-K} \cdot \left(\frac{2}{\mu}(F(x_1) - F(x^*)) + \|x_1 - x^*\|^2\right).$$

**Case II:** Consider another case with  $\frac{n}{\kappa} > \frac{3}{4}$ , choosing  $\eta = \frac{1}{2\mu n}$ ,  $\tau = \frac{n\eta\mu}{1+\eta\mu} = \frac{\frac{1}{2}}{1+\frac{1}{2n}} < \frac{1}{2}$ . Again, we first evaluate the constraint:

$$L\tau \leq \frac{1}{\eta} - \frac{L\tau}{1-\tau} \Rightarrow \tau \cdot \underbrace{\frac{2-\tau}{1-\tau}}_{<3} < \frac{3}{2} < \frac{2n}{\kappa}.$$

Then by rewriting the contraction (9), telescoping from  $k = 1 \dots K$  and taking expectation with respect to all randomness, we obtain

$$2\mathbb{E}[D_{K+1}] + \frac{1}{2\eta n} \mathbb{E}[P_{K+1}] \leq (1 + \eta\mu)^{-K} \cdot \left( 2D_1 + \frac{1}{2\eta n} P_1 \right).$$

By substituting the parameter choices, we have

$$\mathbb{E}[\|x_{K+1} - x^*\|^2] \leq \left(1 + \frac{1}{2n}\right)^{-K} \cdot \left(\frac{2}{\mu}(F(x_1) - F(x^*)) + \|x_1 - x^*\|^2\right).$$

## C About the Lyapunov functions for SAGA and SVRG

The Lyapunov functions used to prove the convergence of SAGA (and SSNM) and SVRG (and its variants):

$$\text{SAGA: } \frac{1}{n} \sum_{i=1}^n F_i(\phi_i) - F(x^*) - \frac{1}{n} \sum_{i=1}^n \langle \nabla F_i(x^*), \phi_i - x^* \rangle + c_1 \|x - x^*\|^2 \quad (10)$$

$$\text{SVRG: } F(\tilde{x}) - F(x^*) + c_2 \|x - x^*\|^2, \quad (11)$$

where  $c_1$  and  $c_2$  are constants. Thus, the convergence of SAGA (and SSNM) is built with respect to  $\|x - x^*\|^2$  and that of SVRG (and its variants) is built with respect to  $F(\tilde{x}) - F(x^*)$ . If  $h \equiv 0$  in Problem (1),  $F(x) - F(x^*)$  and  $\|x - x^*\|^2$  only have a constant difference. However, when  $h \neq 0$ , we only have  $(\mu/2)\|x - x^*\|^2 \leq F(x) - F(x^*)$ . For SAGA (and SSNM), this subtle difference prevents us from using techniques that involve restart (e.g., AdaptSmooth, APPA, Catalyst). In the case where  $h \equiv 0$ , we can use them but an additional  $\log(L/\mu)$  factor will appear in the rate. This difference somehow explains why the SVRG-like variance reduction technique is more favorable in theory than that of SAGA.

## D Experimental setup in Section 6

All the algorithms were implemented in C++ and executed through a MATLAB interface for fair comparison. We ran experiments on an HP Z440 machine with a single Intel Xeon E5-1630v4 with 3.70GHz cores, 16GB RAM, Ubuntu 16.04 LTS with GCC 4.9.0, MATLAB R2017b.

We are optimizing the following binary problem with  $a_i \in \mathbb{R}^d$ ,  $b_i \in \{-1, +1\}$ ,  $i = 1 \dots m$ :

$$\ell_2\text{-Logistic Regression: } \frac{1}{n} \sum_{i=1}^n \log(1 + \exp(-b_i a_i^T x)) + \frac{\lambda}{2} \|x\|^2,$$

where  $\lambda$  is the regularization parameter and all the datasets used were normalized before the experiments.

The parameter settings used in the experiments:

- SAGA. We set the learning rate as  $\frac{1}{2(\mu n + L)}$ , which is analyzed theoretically in [Defazio et al., 2014].
- SSNM. We used the same settings as suggested in Algorithm 1, which are  $\eta = \sqrt{\frac{1}{3\mu n L}}$  and  $\tau = \frac{n\eta\mu}{1+\eta\mu}$ .
- Katyusha. As suggested by the author, we fixed  $\tau_2 = \frac{1}{2}$ , set  $\eta = \frac{1}{3\tau_1 L}$  and chose  $\tau_1 = \sqrt{\frac{m}{3\kappa}}$  [Allen-Zhu, 2017] (In the notations of the original work).
- MiG. We set  $\eta = \frac{1}{3\theta L}$  and chose  $\theta = \sqrt{\frac{m}{3\kappa}}$  as analyzed in [Zhou et al., 2018].

## E An empirical comparison with Point-SAGA

Here we report an experiment comparing the performance of SAGA, Point-SAGA and SSNM with respect to iteration counter. The detailed experimental setting is given in Section 6 in the main paper. Since Point-SAGA requires the exact proximal operator of each  $F_i(\cdot)$  in theory, we focus on training ridge regression in this section:

$$\text{Ridge Regression: } \frac{1}{n} \sum_{i=1}^n \frac{1}{2} (a_i^T x + b_i)^2 + \frac{\lambda}{2} \|x\|^2.$$

Note that the proximal operator of each  $F_i(\cdot) = \frac{1}{2} (a_i^T x + b_i)^2 + \frac{\lambda}{2} \|x\|^2$  can be efficiently computed as mentioned in [Defazio, 2016].

**A memory issue of Point-SAGA:** In fact, when we involve an  $\ell_2$ -regularizer in each  $F_i(\cdot)$ <sup>11</sup>, we cannot use the trick of representing a gradient by a scalar since the update equation of the new table entry  $g_j^{k+1}$  (in original notations) contains a term that correlates to the weight  $x_k$ , which leads to an  $O(nd)$  memory complexity. A possible solution is to separate the proximal computations for the component functions and the regularizer, but it does not fit in the analysis of Point-SAGA.

<sup>11</sup>An  $\ell_2$ -regularizer is always the source of strong convexity for real world problems.

We used the same parameter settings for SAGA and SSNM as in Section 6 in the main paper. For Point-SAGA, we chose the learning rate  $\gamma$  suggested by the original work [Defazio, 2016],

$$\gamma = \frac{\sqrt{(n-1)^2 + 4n\frac{L}{\mu}}}{2Ln} - \frac{1 - \frac{1}{n}}{2L}.$$

The result is shown in Figure 3. As we can see, the convergence rates of Point-SAGA and SSNM are quite similar and consistently faster than SAGA. Although Point-SAGA is shown to be slightly faster than SSNM in this experiment, considering the general objective assumption and the memory issue of Point-SAGA mentioned above, SSNM is a more favorable accelerated variant of SAGA than Point-SAGA in practice. Interestingly, both accelerated variants are more unstable than SAGA in this experiment.

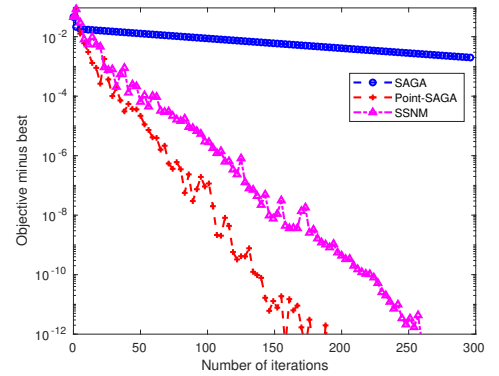

Figure 3: Comparison of SAGA, Point-SAGA and SSNM for solving ridge regression on covtype with  $\lambda = 10^{-8}$ .
